# Supplementary material for: The Methyltransferase WBSCR22/Merm1 Enhances Glucocorticoid Receptor Function and Is Regulated in Lung Inflammation and Cancer
Source: PubMed Central journal article supplement (PMC3979408; doi:10.1074/jbc.m113.540906), 2014-01-31
Supplement: supp_M113.540906_jbc.M113.540906-1.pdf [file supp_M113.540906_jbc.M113.540906-1.pdf]

## Supplemental Information

### Supplementary materials and methods

#### *ChIP primers*

GILZ1 Fwd AGT TGG TAC AAG AAA GTG C  
Rev CTC GTA TGT CAC AAA CTC C; GILZ2 Fwd AAA GAG TAG AAT GTG GAG  
ACT Rev GCA CAG GTC CAT GCT AAT C; GILZ3 Fwd GGG AAT TCT  
GAT ACC AGT TAA GC, Rev GGG AGA CAA TAA TGA TCT CAG GA.

#### *Steroid co-regulator primers*

SRC1 Fwd TGCCTC CGG GTA TCA GTC ACC AG, SRC1 Rev AGG CGT GGG CTG  
GTT CTG GAC AG; GRIP1 Fwd GTG GTA TGC CAG CAA CTA TGAGC,  
GRIP1 Rev TGG ATC AGG TTG CTGACT TAT TCC G; CARM1Fwd  
CACACCGACTTCAAGGACAA ,CARM1 Rev AAAAACGACAGGATCCCAGA. B-Actin  
Fwd GTG GGG CGC CCC AGG CAC CA, B-Actin B Rev CTC CTT AAT GTC ACG  
CAC GAT TTC.

#### *Merm1 mutagenesis*

Mutagenesis was carried out using Quik Change kit, used according to the manufacturer's instructions (Agilent Technologies) using the following primers: Merm1 K180RFwd  
GATCACAACCCA GGCCACAAGGGCAGG CTTCTCCGGTGG, Merm1 K180RRev  
CCACCGGAGAA GCCTGCCCTTGTGGC CTGGGTTGTGATC,  
Merm1 K196RFwd GACTACCCT AACAGTGCCAGAGCAAAG AAATTCTACCTC  
Merm1K196RRev GAGGTAGAAT TTCTTTGCTCTGGCA CTGTTAGGGTAGTC.

## **Supplementary figure legends**

**Figure S1. Merm1 overexpression does not enhance trans-repression.** HeLa cells were transiently co-transfected with NRE-Luc, and as indicated with either GRIP1, Merm1, or an empty plasmid (pcDNA3 or cmv.SP6 vector see experimental procedures section for details), and treated with 0.5 or 5 ng/ml TNF $\alpha$  and 100 nM Dex for 16 hours before luciferase assay. Results are expressed as fold repression (mean and standard deviation), experiments were performed in triplicates, on three separate occasions

**Figure S2. Merm1 co-activates MR, PR and AR.** HEK293T cells were transiently co-transfected with 0.5 $\mu$ g of TAT3-Luc reporter, 0.01 $\mu$ g Renilla reporter, 0.3  $\mu$ g of Merm1 or cmv.SP6 empty vector (EV) and 0.5  $\mu$ g of Mineralocorticoid receptor (MR), progesterone receptor (PR) or androgen receptor (AR) expression vectors, as indicated. Twenty four hours after transfection, cells were incubated with corticosterone (10nM) for MR; progesterone (10nM) for PR; or dihydrotestosterone (DHT) (10nM) for AR, for 16hrs before luciferase assay. Graphs show mean and standard deviation, experiments were performed in triplicates, on three separate occasions. RLU, corrected relative light unit. \*\* p<0.01 data compared using independent samples Student's t test.

**Figure S3. Expression of Merm1 mutants in HEK293T cells.** Merm1 mutants were expressed in HEK293T cells (as described in the experimental procedures). Expression levels were determined by western blotting, using an anti-Merm1 or  $\beta$ -actin antibody to determine equal loading (molecular weight markers shown in kDa). Control Sp6 (empty plasmid), Merm1 wild type [WT] (32 kDa), Merm1 nuclear localisation domain mutant,  $\Delta$ NL (29 kDa); Merm1 SAM-domain mutant,  $\Delta$ SAM (14 kDa), and Merm1 methyltransferase domain mutant,  $\Delta$ MethT (29 kDa).

**Figure S4. Merm1 siRNA does not affect other steroid co-regulators.** A549 cells were transfected with 10nM (s41530) or control siRNA (Dharmacon siCONTROL Nontargeting siRNA) for 48 hours and prior to RNA extraction. The expression of Merm1, SRC1, GRIP1 and CARM1 were measured by qRT-PCR, with  $\beta$ -actin as a house-keeping gene. Graphs show mean gene expression and standard deviation, experiments were performed in triplicates, on three separate occasions.

**Figure S5. Merm1 siRNA inhibits DEX-induced gene expression.** A549 cells were transfected with 10nM Merm1(s41530) or control siRNA (Dharmacon siCONTROL Nontargeting siRNA) for 48 hours. Cells were then treated with dexamethasone (DEX 100 nM) for 2 hours and then RNA extracted. The expression of the GILZ gene was measured by qRT-PCR, with  $\beta$ -actin as a house-keeping gene. Graphs show mean gene expression and standard deviation, experiments were performed in triplicates, on three separate occasions. \* p<0.05 data compared using independent samples Student's t test.

**Figure S6. Merm1 siRNA inhibits DEX-induced MMTV-reporter gene activity.** A549 cells were transfected with 10nM Merm1 or control siRNA for 24 hours and then were transiently co-transfected with 0.5 $\mu$ g of MMTV-Luciferase reporter, 0.01 $\mu$ g Renilla reporter and incubated for a further 24 hours, cells were then treated with DEX (100 nM), for 16hrs before luciferase assay. Graphs show mean luciferase and standard deviation, experiments were performed in triplicates, on three separate occasions \* p<0.05 data compared using independent samples Student's t test.

**Figure S7. GILZ1 region (GL-1) serves as a non-GR binding (negative) control region for the ChIP assay.** HeLa cells were treated with vehicle or 100nM Dex for 1hr. Following fixation and chromatin extraction (see Experimental procedures), ChIP assays were

performed using antibodies against, GR and Merm1 (with IgG as a control). GR binding regions were analysed with primer pairs for GL-1, 2 and 3 promoter regions. PCR products were resolved on agarose gels and visualized by ethidium bromide staining (representative images shown, 3 individual gels).

**Fig S1**

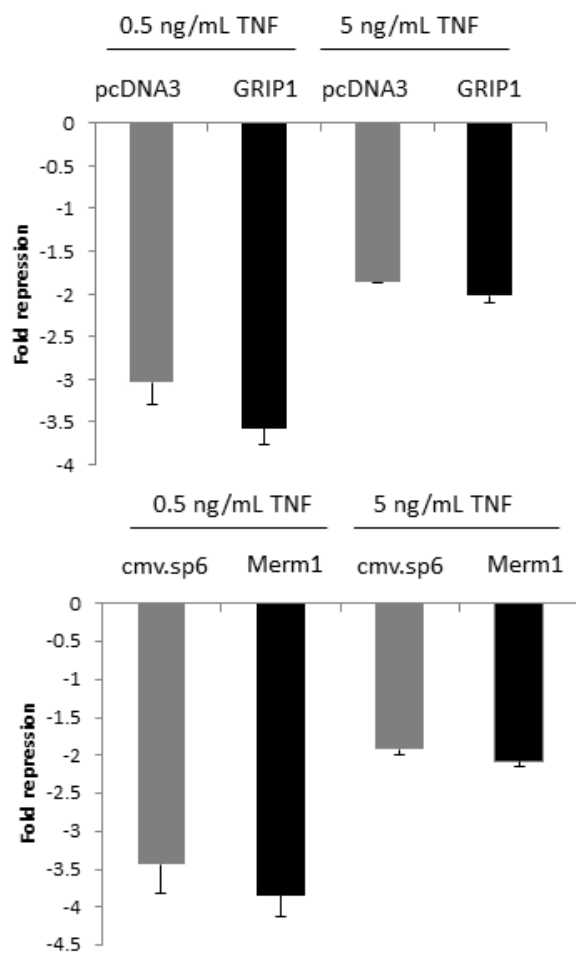

Fig S2

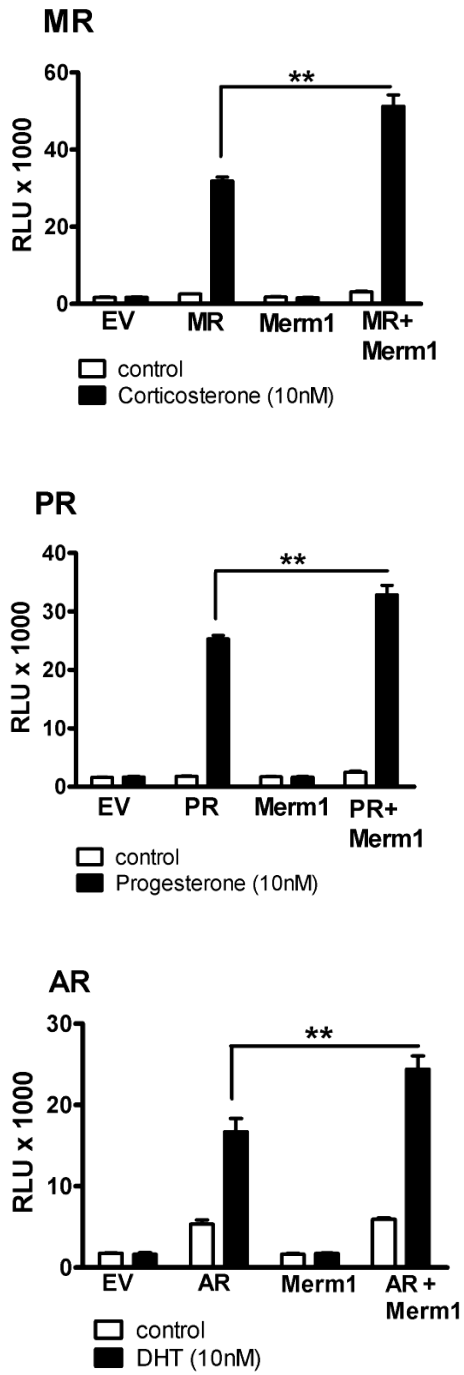

**Fig S3**

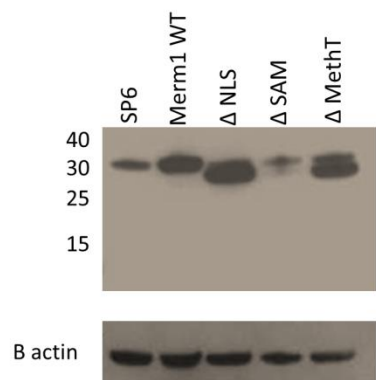

**Fig S4**

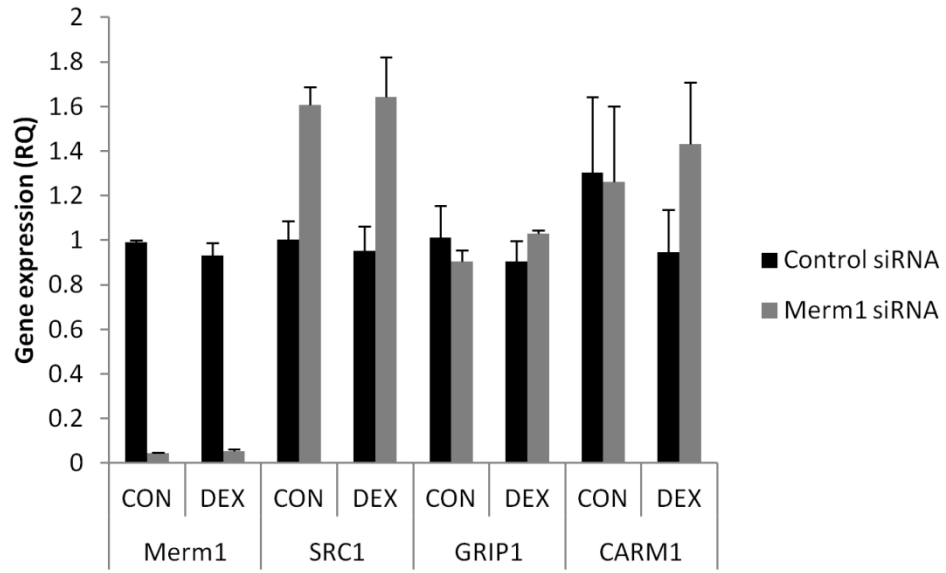

**Fig S5**

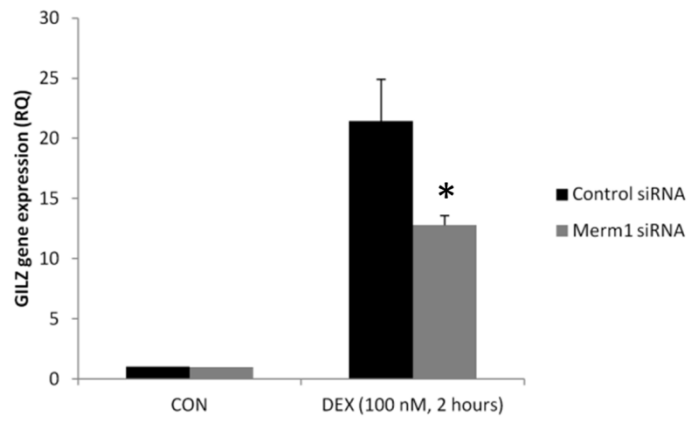



**Fig S6**

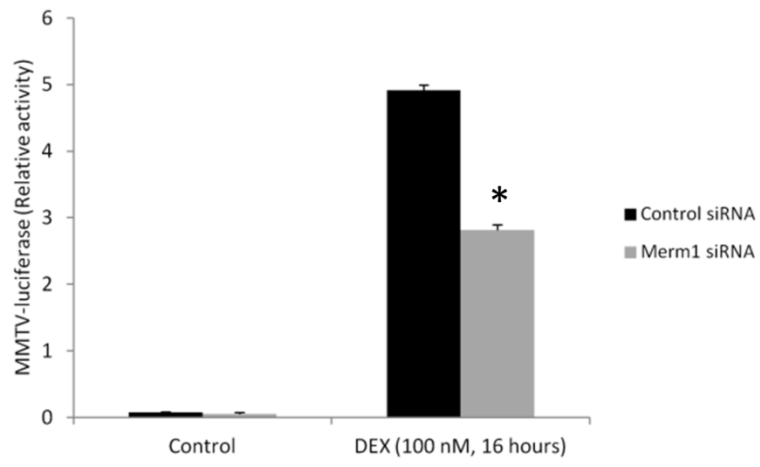

**Fig S7**

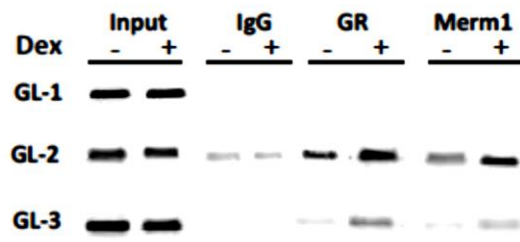

**Supplementary table 1 Data-Merm1 interacting proteins and network analysis. Full list of interacting proteins is available (see merm1 and pHalo interacting proteins.xls)**

**Table S1- Merm1 interacting proteins**

| <b>Merm1 interacting protein</b>                        | <b>Peptides and %Coverage</b> | <b>Function (taken from Uniprot)</b>                                                                                                                     |
|---------------------------------------------------------|-------------------------------|----------------------------------------------------------------------------------------------------------------------------------------------------------|
| RuvB-like 1 and 2                                       | 7/41.9 and 5/28.3             | A member the NuA4 histone acetyltransferase complex                                                                                                      |
| E3 ubiquitin-protein ligase HUWE1                       | 11/13.9                       | E3 ubiquitin-protein ligase that mediates ubiquitination and proteasomal degradation                                                                     |
| E3 ubiquitin-protein ligase UBR5                        | 15/23.0                       | E3 ubiquitin-protein ligase and regulator of DNA damage responses                                                                                        |
| Nucleosome assembly protein 1-like 1 (NAP1)             | 5/50.24                       | Interacts with histones, possibly involved with chromatin formation and cell proliferation                                                               |
| HCLS1-associated protein X-1 (HAX1)                     | 5/53.7                        | Promotes cell survival and cell migration, interacts with XIAP, cleaved by caspase-3 during apoptosis                                                    |
| Nuclease-sensitive element-binding protein 1            | 3/53.7                        | Involved in pre-mRNA splicing regulation. Binds and stabilizes cytoplasmic mRNA. Component of the CRD-mediated complex that promotes MYC mRNA stability. |
| Histone-binding protein RBBP7                           | 4/35.4                        | Core histone binding protein, targets chromatin remodeling factors                                                                                       |
| Histone acetyltransferase type B (HAT1)                 | 4/29.4                        | Acetylates soluble but not nucleosomal histone H4. Possibly involved in nucleosome assembly during DNA replication and repair.                           |
| Proteasome activator complex subunit 3                  | 2/22.8                        | Subunit of the 11S REG-gamma proteasome regulator.                                                                                                       |
| v-Raf-1 murine leukemia viral oncogene homolog 1 (RAF1) | 1/13.5                        | Serine/threonine-protein kinase, regulation of mitogen-activated protein kinase cascades                                                                 |
| Melanoma-associated antigen D2                          | 10/36.3                       | Suppresses the expression of tumor necrosis factor-related apoptosis-inducing ligand (TRAIL) death receptor 2                                            |
| Cyclin-dependent kinase inhibitor 2A                    | 1/6.1                         | Tumour suppressor, interacts with UBE2I/UBC9 and enhances sumoylation of a number of its binding partners, also binds to HUWE1                           |

|                                                |         |                                                                                                                                                                                               |
|------------------------------------------------|---------|-----------------------------------------------------------------------------------------------------------------------------------------------------------------------------------------------|
| Cyclin-dependent kinase 1                      | 3/40.71 | serine/threonine kinase, cell cycle control                                                                                                                                                   |
| tRNA methyltransferase 112 homolog (Trmt112)   | 4/53.6  | Participates both in methylation of protein and tRNA species. The heterodimer with HEMK2/N6AMT1 catalyzes N5-methylation of ETF1 on 'Gln-185', using S-adenosyl L-methionine as methyl donor. |
| rRNA 2'-O-methyltransferase fibrillar in (FBL) | 4/50.5  | Involved in pre-rRNA processing. Utilizes the methyl donor S-adenosyl-L-methionine to catalyze the site-specific 2'-hydroxyl methylation of ribose moieties in pre-ribosomal RNA              |
| RNA methyltransferase-like protein 1 (RNMT1)   | 1/11.9  |                                                                                                                                                                                               |
| RNA-dependent helicase p72 (DDX17)             | 1/7.3   | RNA-dependent ATPase activity. Involved in transcriptional regulation. Transcriptional coactivator for estrogen receptor ESR1                                                                 |
